# Supplementary material for: New insight into photo-induced electron transfer with a simple ubiquinone-based triphenylamine model
Source: Royal Society of Chemistry journal article supplement (doi:10.1039/c5ra09324d), 2015-01-01
Supplement: c5ra09324d1.pdf [file c5ra09324d1.pdf]

*Supporting Information for*

**New Insight into the Photo-induced Electron Transfer  
with a Simple Ubiquinone-based Triphenylamine  
Model**

**Xiao-Yuan Liu, Yi-Tao Long\* and He Tian**

*Key Laboratory for Advanced Materials & Department of Chemistry, East China*

*University of Science and Technology, 130 Meilong Road, Shanghai, 200237, China.*

*\*E-mail: ytlong@ecust.edu.cn*

## **Table of Contents**

|                            |           |
|----------------------------|-----------|
| <b>General Methods</b>     | <b>S3</b> |
| <b>Synthesis</b>           | <b>S4</b> |
| <b>NMR spectra</b>         | <b>S5</b> |
| <b>References</b>          | <b>S6</b> |
| <b>Single Crystal Data</b> | <b>S6</b> |

## General Methods

**General considerations.** HPLC-grade acetonitrile ( $\text{CH}_3\text{CN}$ ) and tetrabutylammonium perchlorate (TBAP, 98%) was purchased from Sigma-Aldrich.  $\text{N}_2$  (99.998%, prepurified) was gained from Cryogenic Gases. All chemical reagents for synthesis and analysis were analytical grade, obtained from commercial suppliers, and used without further purification unless specified.  $^1\text{H}$  NMR and  $^{13}\text{C}$  NMR were acquired in  $\text{CDCl}_3$  on BRUKER AVANCE 500 spectrometer using TMS as an internal standard.

**Electrochemical Measurements.** HPLC-grade  $\text{CH}_3\text{CN}$  was dried by distillation over  $\text{CaH}_2$  before the electrochemical experiments. A three-electrode cell was used for electrochemical measurements. Glassy carbon (GC, 3mm diameter) electrode was used as the work electrode, and platinum wire, Ag/AgCl wire electrode were used as the counter and quasi-reference electrodes, respectively. The measurements were carried out in a test solution containing 1.0 mM TPA- $\text{CoQ}_0$  and 0.1 M tetra-n-butylammonium perchlorate (TBAP). During the measurement, a dry nitrogen purge maintained an oxygen and moisture free environment and the temperature were controlled in  $25^\circ\text{C}$  by using circulating water bath. All the electrochemistry measurements were performed at CHI 660 electrochemical work station (Shanghai Chenhua Co., Ltd., China).

**In Situ Spectroelectrochemical and fluorescence spectroelectrochemical Measurements.** All the spectroelectrochemical and fluorescence spectroelectrochemical experiments were recorded during redox processes of TPA- $\text{CoQ}_0$  in an optically transparent thin layer electrochemical cell (optical path length is 0.6 mm) via an Ocean Optics DT-minutesi-2 halogen recourse and USB2000+ or USB4000+ spectrometer. Platinum net, a platinum wire and Ag/AgCl wire electrode were used as working electrode, counter electrode and reference electrode, respectively. Electrochemical processes during the spectral measurement were controlled by CHI 660 electrochemical workstation (Shanghai Chenhua Co., Ltd., China).

**DFT calculations.** Density Functional Theory (DFT) calculations were carried out using the Gaussian 09 software. Geometries of all species in the calculations were optimized at the b3lyp/6-311++g (d, p) level of theory, and the nature of each stationary point was established by b3lyp/6-311++g (d, p) frequency calculations. Polarizable continuum model (PCM) was used to describe the solvent and the interaction between solvent and solutes.<sup>1</sup>

## Synthesis

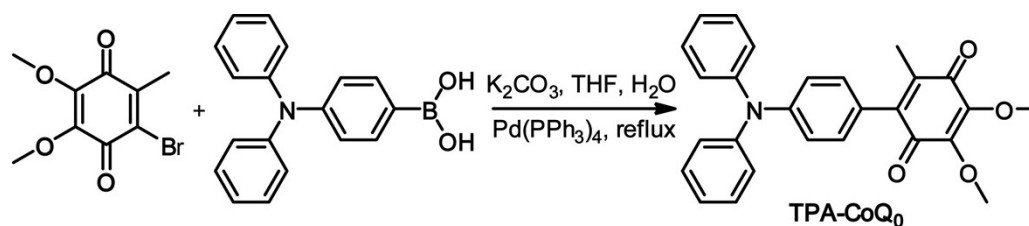

6-Bromo-2,3,6-trimethoxy-1,4-benzoquinone (0.90 g, 3.46 mmol) and K<sub>2</sub>CO<sub>3</sub> (0.95 g, 6.92 mmol) were dissolved in a mixture solution of THF (40 mL) and H<sub>2</sub>O (10 mL) and the mixture solution was degassed. After 4-(diphenylamino)phenylboronic acid (1.00 g, 3.46 mmol) and Pd(PPh<sub>3</sub>)<sub>4</sub> (0.04 g, 3.46 × 10<sup>-2</sup> mmol) were added, the reaction mixture was stirred and refluxed overnight at 102°C under nitrogen atmosphere. The reaction solution was cooled to room temperature and diluted with water (30 mL), and extracted with CH<sub>2</sub>Cl<sub>2</sub> (30 mL × 3). The combined organic phases were washed with brine and were dried over anhydrous Na<sub>2</sub>SO<sub>4</sub>. After evaporation of the solvent, the oily residue was purified by column chromatography to afford TPA-CoQ<sub>0</sub> as a red solid (0.32 g, 24.5%). The structure of TPA-CoQ<sub>0</sub> was confirmed by <sup>1</sup>H and <sup>13</sup>C NMR spectroscopy. δ<sub>H</sub> (400 MHz, CDCl<sub>3</sub>) 7.30–7.26 (4 H, m), 7.18–7.12 (4 H, m), 7.06 (4 H, ddd, *J* 5.7, 2.9, 1.1), 7.03–6.99 (2H, m), 4.06 (3 H, s), 4.01 (3 H, s), 2.02 (3 H, s); δ<sub>C</sub> (101 MHz, CDCl<sub>3</sub>) 184.90, 183.92, 148.23, 147.25, 144.97, 143.97, 141.44, 139.18, 130.92, 129.41, 125.27, 123.60, 121.40, 61.37, 61.17, 14.11.

## NMR spectra

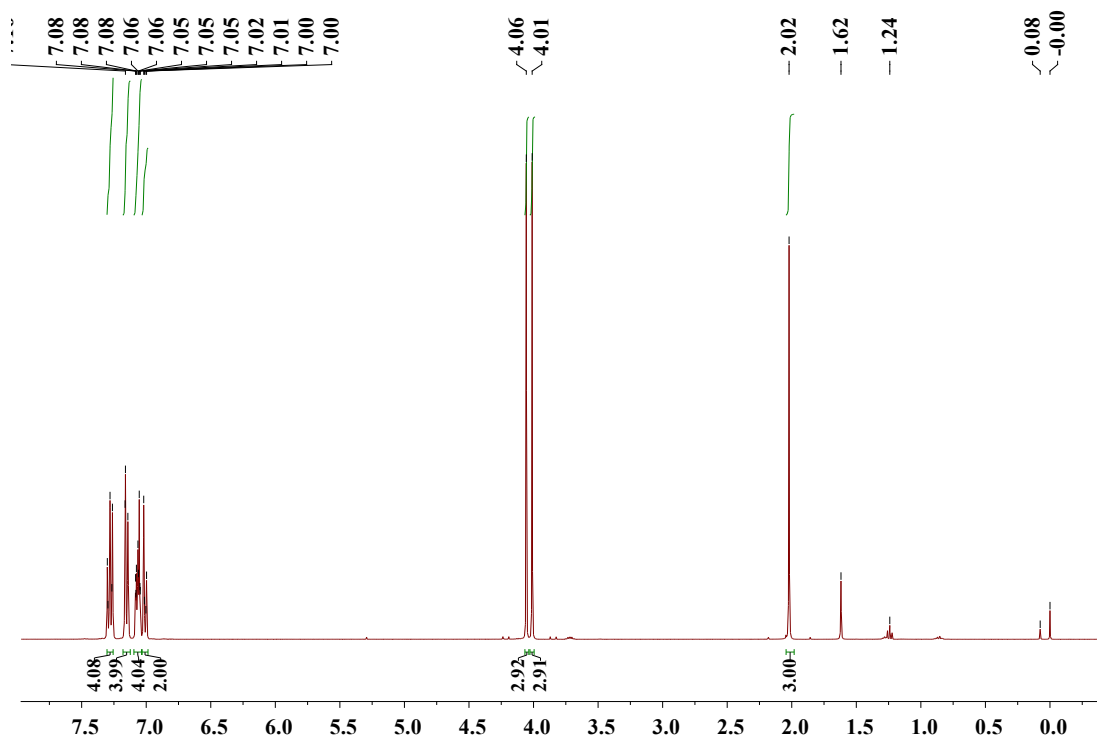

Figure S1. <sup>1</sup>H NMR spectrum of TPA-CoQ<sub>0</sub> in CDCl<sub>3</sub>

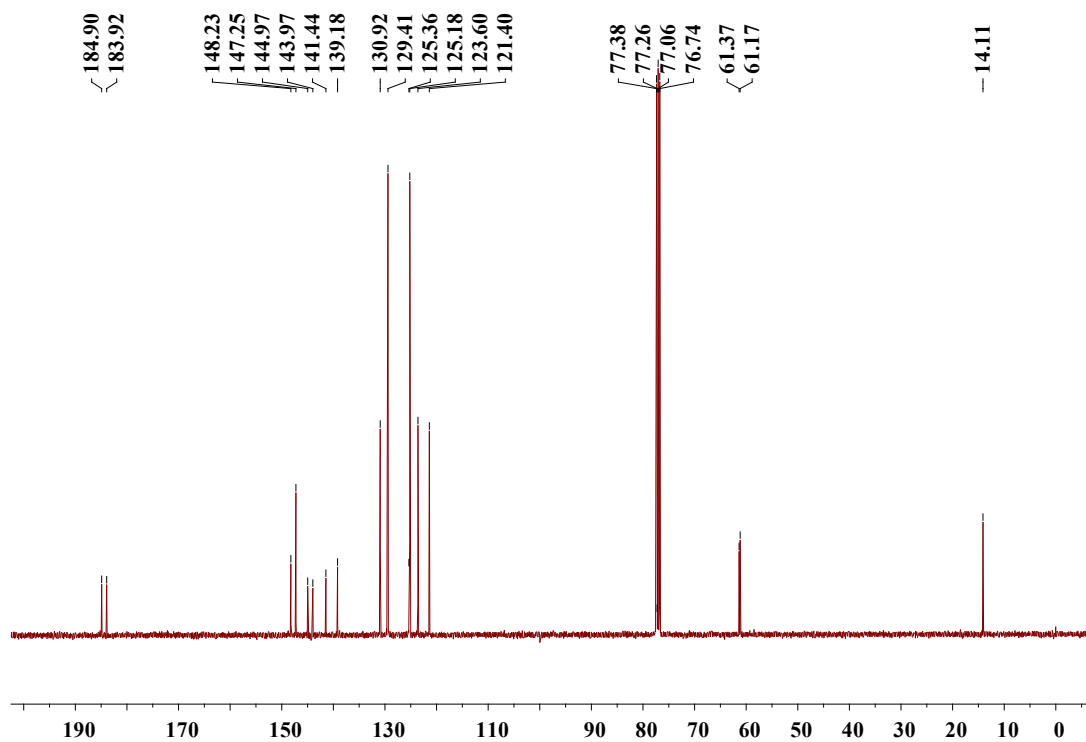

Figure S2. <sup>13</sup>C NMR spectrum of TPA-CoQ<sub>0</sub> in CDCl<sub>3</sub>

## References

1. Namazian, M. & Coote, M.L. Accurate Calculation of Absolute One-Electron Redox Potentials of Some para-Quinone Derivatives in Acetonitrile. *J. Phys. Chem. A* **111**, 7227-7232 (2007).

## Single Crystal Data

Table 1. Crystal data and structure refinement for TPA-CoQ<sub>0</sub>.

|                                   |                                                  |                 |
|-----------------------------------|--------------------------------------------------|-----------------|
| Identification code               | TPA-CoQ <sub>0</sub>                             |                 |
| Empirical formula                 | C <sub>27</sub> H <sub>23</sub> N O <sub>4</sub> |                 |
| Formula weight                    | 425.46                                           |                 |
| Temperature                       | 293(2) K                                         |                 |
| Wavelength                        | 0.71073 Å                                        |                 |
| Crystal system                    | Monoclinic                                       |                 |
| Space group                       | P 21/c                                           |                 |
| Unit cell dimensions              | a = 9.7269(19) Å                                 | α = 90°.        |
|                                   | b = 7.7811(15) Å                                 | β = 95.907(4)°. |
|                                   | c = 28.607(5) Å                                  | γ = 90°.        |
| Volume                            | 2153.6(7) Å <sup>3</sup>                         |                 |
| Z                                 | 4                                                |                 |
| Density (calculated)              | 1.312 Mg/m <sup>3</sup>                          |                 |
| Absorption coefficient            | 0.088 mm <sup>-1</sup>                           |                 |
| F(000)                            | 896                                              |                 |
| Crystal size                      | 0.211 x 0.165 x 0.112 mm <sup>3</sup>            |                 |
| Theta range for data collection   | 2.105 to 25.497°.                                |                 |
| Index ranges                      | -7 ≤ h ≤ 11, -8 ≤ k ≤ 9, -34 ≤ l ≤ 34            |                 |
| Reflections collected             | 11839                                            |                 |
| Independent reflections           | 4008 [R(int) = 0.0522]                           |                 |
| Completeness to theta = 25.242°   | 99.9 %                                           |                 |
| Absorption correction             | Semi-empirical from equivalents                  |                 |
| Max. and min. transmission        | 0.7457 and 0.6285                                |                 |
| Refinement method                 | Full-matrix least-squares on F <sup>2</sup>      |                 |
| Data / restraints / parameters    | 4008 / 38 / 312                                  |                 |
| Goodness-of-fit on F <sup>2</sup> | 1.027                                            |                 |
| Final R indices [I > 2σ(I)]       | R1 = 0.0497, wR2 = 0.1198                        |                 |
| R indices (all data)              | R1 = 0.0653, wR2 = 0.1291                        |                 |
| Extinction coefficient            | 0.0015(10)                                       |                 |
| Largest diff. peak and hole       | 0.223 and -0.219 e.Å <sup>-3</sup>               |                 |

Table 2. Atomic coordinates ( × 10<sup>4</sup>) and equivalent isotropic displacement parameters (Å<sup>2</sup> × 10<sup>3</sup>) for TPA-CoQ<sub>0</sub>. U(eq) is defined as one third of the trace of the orthogonalized U<sup>ij</sup> tensor.

|        | x        | y        | z       | U(eq)  |
|--------|----------|----------|---------|--------|
| N(1)   | 5584(2)  | 8249(2)  | 3670(1) | 41(1)  |
| O(1)   | 264(1)   | 9254(2)  | 2329(1) | 50(1)  |
| O(2)   | -1722(1) | 8462(2)  | 1604(1) | 65(1)  |
| O(4)   | 1966(2)  | 8786(2)  | 682(1)  | 68(1)  |
| C(1)   | 654(2)   | 8750(2)  | 1963(1) | 38(1)  |
| C(2)   | -355(2)  | 8488(3)  | 1546(1) | 45(1)  |
| C(3)   | 76(2)    | 8491(3)  | 1119(1) | 47(1)  |
| C(4)   | 1573(2)  | 8592(3)  | 1067(1) | 44(1)  |
| C(5)   | 2592(2)  | 8417(2)  | 1490(1) | 38(1)  |
| C(6)   | 2161(2)  | 8474(2)  | 1922(1) | 35(1)  |
| C(7)   | 3062(2)  | 8404(2)  | 2371(1) | 33(1)  |
| C(8)   | 4265(2)  | 9376(2)  | 2444(1) | 36(1)  |
| C(9)   | 5094(2)  | 9341(2)  | 2865(1) | 36(1)  |
| C(10)  | 4755(2)  | 8310(2)  | 3233(1) | 34(1)  |
| C(11)  | 3554(2)  | 7324(2)  | 3164(1) | 36(1)  |
| C(12)  | 2725(2)  | 7382(2)  | 2744(1) | 34(1)  |
| C(13)  | 7047(2)  | 8412(2)  | 3702(1) | 37(1)  |
| C(14)  | 7783(2)  | 7874(3)  | 3341(1) | 42(1)  |
| C(15)  | 9201(2)  | 8053(3)  | 3373(1) | 52(1)  |
| C(16)  | 9909(2)  | 8728(3)  | 3771(1) | 64(1)  |
| C(17)  | 9193(2)  | 9240(3)  | 4131(1) | 67(1)  |
| C(18)  | 7771(2)  | 9097(3)  | 4099(1) | 54(1)  |
| C(19)  | 4898(2)  | 8292(2)  | 4087(1) | 39(1)  |
| C(20)  | 5248(2)  | 7151(3)  | 4450(1) | 54(1)  |
| C(21)  | 4550(3)  | 7214(3)  | 4844(1) | 70(1)  |
| C(22)  | 3504(3)  | 8374(3)  | 4879(1) | 66(1)  |
| C(23)  | 3169(2)  | 9525(3)  | 4523(1) | 57(1)  |
| C(24)  | 3869(2)  | 9493(3)  | 4130(1) | 46(1)  |
| C(25)  | 4055(2)  | 8208(3)  | 1384(1) | 50(1)  |
| C(26)  | -2148(2) | 7360(4)  | 1961(1) | 68(1)  |
| O(3)   | -848(10) | 8243(14) | 726(6)  | 66(2)  |
| C(27)  | -1116(8) | 9686(11) | 432(3)  | 101(2) |
| O(3')  | -640(20) | 8480(30) | 703(11) | 71(2)  |
| C(27') | -1801(7) | 9564(10) | 602(2)  | 81(2)  |

Table 3. Bond lengths [ $\text{\AA}$ ] and angles [ $^\circ$ ] for TPA-CoQ<sub>0</sub>.

---

|             |           |
|-------------|-----------|
| N(1)-C(10)  | 1.415(2)  |
| N(1)-C(13)  | 1.422(2)  |
| N(1)-C(19)  | 1.428(2)  |
| O(1)-C(1)   | 1.214(2)  |
| O(2)-C(2)   | 1.357(2)  |
| O(2)-C(26)  | 1.426(3)  |
| O(4)-C(4)   | 1.212(2)  |
| C(1)-C(2)   | 1.479(3)  |
| C(1)-C(6)   | 1.498(2)  |
| C(2)-C(3)   | 1.332(3)  |
| C(3)-O(3')  | 1.31(3)   |
| C(3)-O(3)   | 1.378(14) |
| C(3)-C(4)   | 1.481(3)  |
| C(4)-C(5)   | 1.490(3)  |
| C(5)-C(6)   | 1.345(2)  |
| C(5)-C(25)  | 1.494(3)  |
| C(6)-C(7)   | 1.481(2)  |
| C(7)-C(8)   | 1.391(2)  |
| C(7)-C(12)  | 1.396(2)  |
| C(8)-C(9)   | 1.378(2)  |
| C(8)-H(8)   | 0.9300    |
| C(9)-C(10)  | 1.391(2)  |
| C(9)-H(9)   | 0.9300    |
| C(10)-C(11) | 1.395(2)  |
| C(11)-C(12) | 1.377(2)  |
| C(11)-H(11) | 0.9300    |
| C(12)-H(12) | 0.9300    |
| C(13)-C(14) | 1.379(3)  |
| C(13)-C(18) | 1.381(3)  |
| C(14)-C(15) | 1.380(3)  |
| C(14)-H(14) | 0.9300    |
| C(15)-C(16) | 1.372(3)  |
| C(15)-H(15) | 0.9300    |
| C(16)-C(17) | 1.361(3)  |
| C(16)-H(16) | 0.9300    |
| C(17)-C(18) | 1.382(3)  |



|                  |            |
|------------------|------------|
| C(17)-H(17)      | 0.9300     |
| C(18)-H(18)      | 0.9300     |
| C(19)-C(20)      | 1.382(3)   |
| C(19)-C(24)      | 1.383(3)   |
| C(20)-C(21)      | 1.375(3)   |
| C(20)-H(20)      | 0.9300     |
| C(21)-C(22)      | 1.372(4)   |
| C(21)-H(21)      | 0.9300     |
| C(22)-C(23)      | 1.369(3)   |
| C(22)-H(22)      | 0.9300     |
| C(23)-C(24)      | 1.376(3)   |
| C(23)-H(23)      | 0.9300     |
| C(24)-H(24)      | 0.9300     |
| C(25)-H(25A)     | 0.9600     |
| C(25)-H(25B)     | 0.9600     |
| C(25)-H(25C)     | 0.9600     |
| C(26)-H(26A)     | 0.9600     |
| C(26)-H(26B)     | 0.9600     |
| C(26)-H(26C)     | 0.9600     |
| O(3)-C(27)       | 1.410(12)  |
| C(27)-H(27A)     | 0.9600     |
| C(27)-H(27B)     | 0.9600     |
| C(27)-H(27C)     | 0.9600     |
| O(3')-C(27')     | 1.418(17)  |
| C(27')-H(27D)    | 0.9600     |
| C(27')-H(27E)    | 0.9600     |
| C(27')-H(27F)    | 0.9600     |
|                  |            |
| C(10)-N(1)-C(13) | 121.95(14) |
| C(10)-N(1)-C(19) | 117.63(14) |
| C(13)-N(1)-C(19) | 119.70(14) |
| C(2)-O(2)-C(26)  | 117.19(16) |
| O(1)-C(1)-C(2)   | 119.96(16) |
| O(1)-C(1)-C(6)   | 120.69(17) |
| C(2)-C(1)-C(6)   | 119.28(15) |
| C(3)-C(2)-O(2)   | 121.12(17) |
| C(3)-C(2)-C(1)   | 119.69(17) |
| O(2)-C(2)-C(1)   | 118.68(16) |

|                   |            |
|-------------------|------------|
| O(3')-C(3)-C(2)   | 130.2(11)  |
| C(2)-C(3)-O(3)    | 120.5(6)   |
| O(3')-C(3)-C(4)   | 110.0(11)  |
| C(2)-C(3)-C(4)    | 119.82(17) |
| O(3)-C(3)-C(4)    | 119.4(6)   |
| O(4)-C(4)-C(3)    | 120.24(18) |
| O(4)-C(4)-C(5)    | 120.28(18) |
| C(3)-C(4)-C(5)    | 119.46(15) |
| C(6)-C(5)-C(4)    | 119.95(16) |
| C(6)-C(5)-C(25)   | 125.66(17) |
| C(4)-C(5)-C(25)   | 114.39(15) |
| C(5)-C(6)-C(7)    | 125.71(16) |
| C(5)-C(6)-C(1)    | 118.53(16) |
| C(7)-C(6)-C(1)    | 115.63(14) |
| C(8)-C(7)-C(12)   | 117.08(15) |
| C(8)-C(7)-C(6)    | 121.60(15) |
| C(12)-C(7)-C(6)   | 121.31(15) |
| C(9)-C(8)-C(7)    | 121.83(16) |
| C(9)-C(8)-H(8)    | 119.1      |
| C(7)-C(8)-H(8)    | 119.1      |
| C(8)-C(9)-C(10)   | 120.71(16) |
| C(8)-C(9)-H(9)    | 119.6      |
| C(10)-C(9)-H(9)   | 119.6      |
| C(9)-C(10)-C(11)  | 118.01(15) |
| C(9)-C(10)-N(1)   | 121.99(16) |
| C(11)-C(10)-N(1)  | 120.01(15) |
| C(12)-C(11)-C(10) | 120.84(15) |
| C(12)-C(11)-H(11) | 119.6      |
| C(10)-C(11)-H(11) | 119.6      |
| C(11)-C(12)-C(7)  | 121.53(16) |
| C(11)-C(12)-H(12) | 119.2      |
| C(7)-C(12)-H(12)  | 119.2      |
| C(14)-C(13)-C(18) | 118.21(17) |
| C(14)-C(13)-N(1)  | 121.18(16) |
| C(18)-C(13)-N(1)  | 120.60(16) |
| C(13)-C(14)-C(15) | 120.79(19) |
| C(13)-C(14)-H(14) | 119.6      |
| C(15)-C(14)-H(14) | 119.6      |

|                     |            |
|---------------------|------------|
| C(16)-C(15)-C(14)   | 120.41(19) |
| C(16)-C(15)-H(15)   | 119.8      |
| C(14)-C(15)-H(15)   | 119.8      |
| C(17)-C(16)-C(15)   | 119.2(2)   |
| C(17)-C(16)-H(16)   | 120.4      |
| C(15)-C(16)-H(16)   | 120.4      |
| C(16)-C(17)-C(18)   | 120.8(2)   |
| C(16)-C(17)-H(17)   | 119.6      |
| C(18)-C(17)-H(17)   | 119.6      |
| C(17)-C(18)-C(13)   | 120.5(2)   |
| C(17)-C(18)-H(18)   | 119.7      |
| C(13)-C(18)-H(18)   | 119.7      |
| C(20)-C(19)-C(24)   | 119.55(17) |
| C(20)-C(19)-N(1)    | 120.88(18) |
| C(24)-C(19)-N(1)    | 119.57(17) |
| C(21)-C(20)-C(19)   | 119.3(2)   |
| C(21)-C(20)-H(20)   | 120.4      |
| C(19)-C(20)-H(20)   | 120.4      |
| C(22)-C(21)-C(20)   | 121.0(2)   |
| C(22)-C(21)-H(21)   | 119.5      |
| C(20)-C(21)-H(21)   | 119.5      |
| C(23)-C(22)-C(21)   | 119.9(2)   |
| C(23)-C(22)-H(22)   | 120.0      |
| C(21)-C(22)-H(22)   | 120.0      |
| C(22)-C(23)-C(24)   | 119.8(2)   |
| C(22)-C(23)-H(23)   | 120.1      |
| C(24)-C(23)-H(23)   | 120.1      |
| C(23)-C(24)-C(19)   | 120.5(2)   |
| C(23)-C(24)-H(24)   | 119.8      |
| C(19)-C(24)-H(24)   | 119.8      |
| C(5)-C(25)-H(25A)   | 109.5      |
| C(5)-C(25)-H(25B)   | 109.5      |
| H(25A)-C(25)-H(25B) | 109.5      |
| C(5)-C(25)-H(25C)   | 109.5      |
| H(25A)-C(25)-H(25C) | 109.5      |
| H(25B)-C(25)-H(25C) | 109.5      |
| O(2)-C(26)-H(26A)   | 109.5      |
| O(2)-C(26)-H(26B)   | 109.5      |

|                      |          |
|----------------------|----------|
| H(26A)-C(26)-H(26B)  | 109.5    |
| O(2)-C(26)-H(26C)    | 109.5    |
| H(26A)-C(26)-H(26C)  | 109.5    |
| H(26B)-C(26)-H(26C)  | 109.5    |
| C(3)-O(3)-C(27)      | 116.0(9) |
| O(3)-C(27)-H(27A)    | 109.5    |
| O(3)-C(27)-H(27B)    | 109.5    |
| H(27A)-C(27)-H(27B)  | 109.5    |
| O(3)-C(27)-H(27C)    | 109.5    |
| H(27A)-C(27)-H(27C)  | 109.5    |
| H(27B)-C(27)-H(27C)  | 109.5    |
| C(3)-O(3')-C(27')    | 121(2)   |
| O(3')-C(27')-H(27D)  | 109.5    |
| O(3')-C(27')-H(27E)  | 109.5    |
| H(27D)-C(27')-H(27E) | 109.5    |
| O(3')-C(27')-H(27F)  | 109.5    |
| H(27D)-C(27')-H(27F) | 109.5    |
| H(27E)-C(27')-H(27F) | 109.5    |

---

Symmetry transformations used to generate equivalent atoms:

Table 4. Anisotropic displacement parameters ( $\text{\AA}^2 \times 10^3$ ) for cd214669. The anisotropic displacement factor exponent takes the form:  $-2\pi^2 [ h^2 a^{*2} U^{11} + \dots + 2 h k a^* b^* U^{12} ]$

|      | U <sup>11</sup> | U <sup>22</sup> | U <sup>33</sup> | U <sup>23</sup> | U <sup>13</sup> | U <sup>12</sup> |
|------|-----------------|-----------------|-----------------|-----------------|-----------------|-----------------|
| N(1) | 30(1)           | 64(1)           | 30(1)           | -1(1)           | 3(1)            | -1(1)           |
| O(1) | 39(1)           | 70(1)           | 43(1)           | -7(1)           | 8(1)            | 5(1)            |
| O(2) | 33(1)           | 100(1)          | 59(1)           | 15(1)           | -3(1)           | 7(1)            |
| O(4) | 72(1)           | 98(1)           | 33(1)           | 4(1)            | 9(1)            | 13(1)           |
| C(1) | 35(1)           | 43(1)           | 37(1)           | 3(1)            | 5(1)            | 3(1)            |
| C(2) | 33(1)           | 53(1)           | 45(1)           | 4(1)            | -3(1)           | 7(1)            |
| C(3) | 48(1)           | 53(1)           | 37(1)           | 1(1)            | -8(1)           | 9(1)            |
| C(4) | 54(1)           | 47(1)           | 32(1)           | 1(1)            | 4(1)            | 8(1)            |
| C(5) | 40(1)           | 39(1)           | 37(1)           | 3(1)            | 6(1)            | 4(1)            |
| C(6) | 33(1)           | 38(1)           | 34(1)           | 2(1)            | 2(1)            | 1(1)            |
| C(7) | 29(1)           | 37(1)           | 32(1)           | 0(1)            | 5(1)            | 3(1)            |
| C(8) | 36(1)           | 39(1)           | 35(1)           | 7(1)            | 7(1)            | 0(1)            |

|        |        |        |       |        |        |        |
|--------|--------|--------|-------|--------|--------|--------|
| C(9)   | 30(1)  | 40(1)  | 40(1) | 0(1)   | 5(1)   | -5(1)  |
| C(10)  | 30(1)  | 42(1)  | 30(1) | -2(1)  | 4(1)   | 2(1)   |
| C(11)  | 34(1)  | 43(1)  | 32(1) | 6(1)   | 9(1)   | 0(1)   |
| C(12)  | 27(1)  | 40(1)  | 37(1) | -2(1)  | 6(1)   | -4(1)  |
| C(13)  | 31(1)  | 40(1)  | 39(1) | 0(1)   | 0(1)   | 0(1)   |
| C(14)  | 34(1)  | 48(1)  | 43(1) | -3(1)  | 3(1)   | -2(1)  |
| C(15)  | 37(1)  | 59(1)  | 62(1) | 1(1)   | 12(1)  | 1(1)   |
| C(16)  | 33(1)  | 78(2)  | 79(2) | -3(1)  | -1(1)  | -7(1)  |
| C(17)  | 45(1)  | 82(2)  | 69(2) | -17(1) | -12(1) | -12(1) |
| C(18)  | 44(1)  | 68(1)  | 48(1) | -15(1) | -1(1)  | -2(1)  |
| C(19)  | 37(1)  | 49(1)  | 32(1) | -4(1)  | 4(1)   | -7(1)  |
| C(20)  | 75(2)  | 49(1)  | 38(1) | 0(1)   | 8(1)   | 4(1)   |
| C(21)  | 118(2) | 54(1)  | 38(1) | 2(1)   | 18(1)  | -9(2)  |
| C(22)  | 88(2)  | 68(2)  | 48(1) | -17(1) | 33(1)  | -26(1) |
| C(23)  | 46(1)  | 71(2)  | 56(1) | -18(1) | 16(1)  | -8(1)  |
| C(24)  | 38(1)  | 58(1)  | 40(1) | -1(1)  | 2(1)   | -3(1)  |
| C(25)  | 46(1)  | 64(1)  | 42(1) | 4(1)   | 14(1)  | 4(1)   |
| C(26)  | 44(1)  | 91(2)  | 69(2) | 5(1)   | 5(1)   | -15(1) |
| O(3)   | 62(3)  | 84(3)  | 47(2) | 0(2)   | -20(2) | 5(2)   |
| C(27)  | 99(5)  | 110(4) | 86(4) | 27(4)  | -36(4) | 9(4)   |
| O(3')  | 66(4)  | 93(4)  | 50(3) | 1(4)   | -21(4) | 17(4)  |
| C(27') | 76(4)  | 94(4)  | 65(3) | 5(3)   | -23(3) | 27(4)  |

Table 5. Hydrogen coordinates ( $\times 10^4$ ) and isotropic displacement parameters ( $\text{\AA}^2 \times 10^3$ ) for TPA-CoQ<sub>0</sub>.

|       | x     | y     | z    | U(eq) |
|-------|-------|-------|------|-------|
| H(8)  | 4518  | 10068 | 2202 | 44    |
| H(9)  | 5887  | 10015 | 2903 | 44    |
| H(11) | 3309  | 6619  | 3405 | 43    |
| H(12) | 1923  | 6724  | 2708 | 41    |
| H(14) | 7318  | 7384  | 3073 | 50    |
| H(15) | 9680  | 7715  | 3124 | 63    |
| H(16) | 10866 | 8835  | 3794 | 76    |
| H(17) | 9668  | 9692  | 4402 | 80    |
| H(18) | 7297  | 9465  | 4347 | 65    |

|        |       |       |      |     |
|--------|-------|-------|------|-----|
| H(20)  | 5948  | 6350  | 4428 | 65  |
| H(21)  | 4791  | 6458  | 5091 | 83  |
| H(22)  | 3022  | 8379  | 5143 | 80  |
| H(23)  | 2470  | 10326 | 4548 | 68  |
| H(24)  | 3650  | 10284 | 3890 | 55  |
| H(25A) | 4429  | 9311  | 1315 | 75  |
| H(25B) | 4085  | 7464  | 1118 | 75  |
| H(25C) | 4592  | 7717  | 1651 | 75  |
| H(26A) | -1494 | 6441  | 2017 | 102 |
| H(26B) | -3043 | 6894  | 1860 | 102 |
| H(26C) | -2193 | 8005  | 2245 | 102 |
| H(27A) | -1520 | 10581 | 604  | 152 |
| H(27B) | -1743 | 9369  | 165  | 152 |
| H(27C) | -266  | 10089 | 328  | 152 |
| H(27D) | -2555 | 9142  | 761  | 121 |
| H(27E) | -2064 | 9574  | 269  | 121 |
| H(27F) | -1571 | 10709 | 707  | 121 |

Table 6. Torsion angles [°] for TPA-CoQ<sub>0</sub>.

|                      |            |
|----------------------|------------|
| C(26)-O(2)-C(2)-C(3) | 137.7(2)   |
| C(26)-O(2)-C(2)-C(1) | -50.5(3)   |
| O(1)-C(1)-C(2)-C(3)  | 158.1(2)   |
| C(6)-C(1)-C(2)-C(3)  | -18.8(3)   |
| O(1)-C(1)-C(2)-O(2)  | -13.8(3)   |
| C(6)-C(1)-C(2)-O(2)  | 169.27(18) |
| O(2)-C(2)-C(3)-O(3') | 0.3(13)    |
| C(1)-C(2)-C(3)-O(3') | -171.4(13) |
| O(2)-C(2)-C(3)-O(3)  | -8.6(6)    |
| C(1)-C(2)-C(3)-O(3)  | 179.8(5)   |
| O(2)-C(2)-C(3)-C(4)  | 177.46(18) |
| C(1)-C(2)-C(3)-C(4)  | 5.8(3)     |
| O(3')-C(3)-C(4)-O(4) | 5.8(11)    |
| C(2)-C(3)-C(4)-O(4)  | -171.9(2)  |
| O(3)-C(3)-C(4)-O(4)  | 14.0(6)    |
| O(3')-C(3)-C(4)-C(5) | -172.9(10) |
| C(2)-C(3)-C(4)-C(5)  | 9.4(3)     |
| O(3)-C(3)-C(4)-C(5)  | -164.7(5)  |

|                         |             |
|-------------------------|-------------|
| O(4)-C(4)-C(5)-C(6)     | 169.57(19)  |
| C(3)-C(4)-C(5)-C(6)     | -11.7(3)    |
| O(4)-C(4)-C(5)-C(25)    | -9.7(3)     |
| C(3)-C(4)-C(5)-C(25)    | 169.04(18)  |
| C(4)-C(5)-C(6)-C(7)     | -176.78(17) |
| C(25)-C(5)-C(6)-C(7)    | 2.4(3)      |
| C(4)-C(5)-C(6)-C(1)     | -1.2(3)     |
| C(25)-C(5)-C(6)-C(1)    | 177.94(18)  |
| O(1)-C(1)-C(6)-C(5)     | -160.59(18) |
| C(2)-C(1)-C(6)-C(5)     | 16.3(3)     |
| O(1)-C(1)-C(6)-C(7)     | 15.4(3)     |
| C(2)-C(1)-C(6)-C(7)     | -167.68(16) |
| C(5)-C(6)-C(7)-C(8)     | 45.2(3)     |
| C(1)-C(6)-C(7)-C(8)     | -130.47(17) |
| C(5)-C(6)-C(7)-C(12)    | -135.98(19) |
| C(1)-C(6)-C(7)-C(12)    | 48.3(2)     |
| C(12)-C(7)-C(8)-C(9)    | -0.1(3)     |
| C(6)-C(7)-C(8)-C(9)     | 178.72(16)  |
| C(7)-C(8)-C(9)-C(10)    | 0.6(3)      |
| C(8)-C(9)-C(10)-C(11)   | -0.3(3)     |
| C(8)-C(9)-C(10)-N(1)    | -179.92(16) |
| C(13)-N(1)-C(10)-C(9)   | -34.0(3)    |
| C(19)-N(1)-C(10)-C(9)   | 136.21(18)  |
| C(13)-N(1)-C(10)-C(11)  | 146.36(17)  |
| C(19)-N(1)-C(10)-C(11)  | -43.4(2)    |
| C(9)-C(10)-C(11)-C(12)  | -0.4(3)     |
| N(1)-C(10)-C(11)-C(12)  | 179.23(16)  |
| C(10)-C(11)-C(12)-C(7)  | 0.9(3)      |
| C(8)-C(7)-C(12)-C(11)   | -0.6(3)     |
| C(6)-C(7)-C(12)-C(11)   | -179.44(16) |
| C(10)-N(1)-C(13)-C(14)  | -29.7(3)    |
| C(19)-N(1)-C(13)-C(14)  | 160.22(18)  |
| C(10)-N(1)-C(13)-C(18)  | 151.13(19)  |
| C(19)-N(1)-C(13)-C(18)  | -18.9(3)    |
| C(18)-C(13)-C(14)-C(15) | -1.5(3)     |
| N(1)-C(13)-C(14)-C(15)  | 179.34(18)  |
| C(13)-C(14)-C(15)-C(16) | 1.9(3)      |
| C(14)-C(15)-C(16)-C(17) | -0.9(4)     |

|                         |            |
|-------------------------|------------|
| C(15)-C(16)-C(17)-C(18) | -0.4(4)    |
| C(16)-C(17)-C(18)-C(13) | 0.7(4)     |
| C(14)-C(13)-C(18)-C(17) | 0.3(3)     |
| N(1)-C(13)-C(18)-C(17)  | 179.4(2)   |
| C(10)-N(1)-C(19)-C(20)  | 133.2(2)   |
| C(13)-N(1)-C(19)-C(20)  | -56.4(3)   |
| C(10)-N(1)-C(19)-C(24)  | -46.9(2)   |
| C(13)-N(1)-C(19)-C(24)  | 123.5(2)   |
| C(24)-C(19)-C(20)-C(21) | 1.1(3)     |
| N(1)-C(19)-C(20)-C(21)  | -179.0(2)  |
| C(19)-C(20)-C(21)-C(22) | 0.8(4)     |
| C(20)-C(21)-C(22)-C(23) | -1.9(4)    |
| C(21)-C(22)-C(23)-C(24) | 1.1(3)     |
| C(22)-C(23)-C(24)-C(19) | 0.8(3)     |
| C(20)-C(19)-C(24)-C(23) | -1.9(3)    |
| N(1)-C(19)-C(24)-C(23)  | 178.21(18) |
| O(3')-C(3)-O(3)-C(27)   | -35(7)     |
| C(2)-C(3)-O(3)-C(27)    | 110.3(9)   |
| C(4)-C(3)-O(3)-C(27)    | -75.7(11)  |
| C(2)-C(3)-O(3')-C(27')  | 45(2)      |
| O(3)-C(3)-O(3')-C(27')  | 84(7)      |
| C(4)-C(3)-O(3')-C(27')  | -132.6(16) |

---

Symmetry transformations used to generate equivalent atoms:

Table 7. Hydrogen bonds for TPA-CoQ<sub>0</sub> [ $\text{\AA}$  and  $^\circ$ ].

---

| D-H...A | d(D-H) | d(H...A) | d(D...A) | $\angle$ (DHA) |
|---------|--------|----------|----------|----------------|
|---------|--------|----------|----------|----------------|

---
